# Supplementary material for: Bidirectional modulation of microRNA with a clamp-like triplex switch for enhanced and programmed gene therapy
Source: Royal Society of Chemistry journal article supplement (doi:10.1039/d1cc04325k), 2021-01-01
Supplement: d1cc04325k1.pdf [file d1cc04325k1.pdf]

# Supporting Information

*of*

## **Bidirectional modulation of microRNA with a clamp-like triplex switch for enhanced and programmed gene therapy**

Lihua Zhang,<sup>ab</sup> Zhen Zou,<sup>c</sup> Yanli Lei,<sup>\*c</sup> Zhihe Qing,<sup>c</sup> Yu Zeng,<sup>c</sup> Haiyan Sun,<sup>c</sup> Feng Feng<sup>\*ab</sup> and Ronghua Yang<sup>\*cd</sup>

<sup>a</sup> School of Chemistry and Material Science, Shanxi Normal University, Linfen 041004

<sup>b</sup> College of Chemistry and Chemical Engineering, Shanxi Datong University, Datong 037009

<sup>c</sup> School of Chemistry and Food Engineering, Changsha University of Science and Technology, Changsha 410004

<sup>d</sup> College of Chemistry and Chemical Engineering, Hunan Normal University, Changsha 410081

\* Corresponding author: leiyanli222@126.com; feng-feng64@263.net; yangrh@pku.edu.cn

## Table of Contents

|                                                                                                                                            |      |
|--------------------------------------------------------------------------------------------------------------------------------------------|------|
| <b>Experimental Section</b> .....                                                                                                          | S-4  |
| Chemicals .....                                                                                                                            | S-4  |
| Preparation and Characterization of CTS.....                                                                                               | S-4  |
| Cell Culture .....                                                                                                                         | S-5  |
| Cytotoxicity of Lipofectamine 3000 .....                                                                                                   | S-5  |
| Intracellular Activation of CTS.....                                                                                                       | S-6  |
| In Vitro Cytotoxicity Assessment .....                                                                                                     | S-6  |
| Cellular Migration and Survival Performance .....                                                                                          | S-6  |
| Cell Apoptosis .....                                                                                                                       | S-7  |
| RT-PCR Quantification .....                                                                                                                | S-7  |
| Western Blot Analysis.....                                                                                                                 | S-7  |
| <b>Supplementary Tables</b> .....                                                                                                          | S-9  |
| <b>Table S1.</b> The oligonucleotides and triplex switches used in this work.....                                                          | S-9  |
| <b>Table S2.</b> Quantification of hmga2 expression in Fig. 3A .....                                                                       | S-10 |
| <b>Table S3.</b> Quantification of cell viability in Fig. 3C .....                                                                         | S-11 |
| <b>Table S4.</b> Quantification of hmga2, socs1 expression in Fig. 4A .....                                                                | S-11 |
| <b>Table S5.</b> Quantification of cell viability in Fig. 4C .....                                                                         | S-11 |
| <b>Table S6.</b> Quantification of colony density in Fig. 4D.....                                                                          | S-11 |
| <b>Supplementary Figures</b> .....                                                                                                         | S-12 |
| <b>Fig. S1.</b> The sequence details of CTS-1, CTS-2, CTS-3.....                                                                           | S-12 |
| <b>Fig. S2.</b> Fluorescence changes of Anti-155-Es before and after adding into let-7a mimic and CNSs in response to DNA-155 .....        | S-13 |
| <b>Fig. S3.</b> The melting temperature ( $T_m$ ) curves of CTS, Anti-155-E+miR-155, Con <sub>D</sub> -CTS and Con <sub>N</sub> -CTS ..... | S-14 |
| <b>Fig. S4.</b> Viability of MCF-7 cells treated with let-7a, let-7a mimic, anti-155 and Anti-155-E for 48 h.....                          | S-15 |
| <b>Fig. S5.</b> Validation of CTS's assembly and disassembly in response to different                                                      |      |

|                                                                                                                                                      |      |
|------------------------------------------------------------------------------------------------------------------------------------------------------|------|
| oligonucleotides. ....                                                                                                                               | S-16 |
| <b>Fig. S6.</b> The sequence details of Con <sub>L</sub> -CTS, Con <sub>D</sub> -CTS and Con <sub>N</sub> -CTS.....                                  | S-17 |
| <b>Fig. S7.</b> Illustration and fluorescence change of the assembly of Con <sub>L</sub> -CTS and its response behavior to DNA-155. ....             | S-18 |
| <b>Fig. S8.</b> 15% PAGE analysis the assembly and disassembly of Con <sub>L</sub> -CTS.....                                                         | S-19 |
| <b>Fig. S9.</b> Changes of circular dichroism spectra of CTS and Con <sub>L</sub> -CTS in response to DNA-155. ....                                  | S-20 |
| <b>Fig. S10.</b> The fluorescence intensity of CTS in the presence of different analytes. ....                                                       | S-21 |
| <b>Fig. S11.</b> Fluorescence recovery of CTS in response to DNA-155 with varying concentrations .....                                               | S-22 |
| <b>Fig. S12.</b> Cytotoxicity of Lipofectamine 3000 to MCF-7 and MCF-10A cells.....                                                                  | S-23 |
| <b>Fig. S13.</b> Confocal microscopy images of MCF-7 cells treated with CTS for different times. ....                                                | S-24 |
| <b>Fig. S14.</b> Confocal microscopy images of MCF-10A cells treated with CTS for different times. ....                                              | S-25 |
| <b>Fig. S15.</b> Viability of MCF-7 cells treated with CTS at different doses for 48 h. ....                                                         | S-26 |
| <b>Fig. S16.</b> Graph depicts the colony density of MCF-7 cells of in Fig. 4D. ....                                                                 | S-27 |
| <b>Fig. S17.</b> Graph depicts the apoptotic rate in MCF-7 cells in Fig. 4E.....                                                                     | S-28 |
| <b>Fig. S18.</b> Graph depicts the relative width of open wound in Fig. 4F .....                                                                     | S-29 |
| <b>Fig. S19.</b> The sequence details of CTS-4, CTS-5 and CTS-6 .....                                                                                | S-30 |
| <b>Fig. S20.</b> Fluorescence and CD spectra analysis the assembly and disassembly of CTS-4, CTS-5 and CTS-6 in response to different targets . .... | S-31 |
| <b>Fig. S21.</b> Viability of MDA-MB-231 and MCF-7 cells treated with CTS-4, CTS-5 and CTS-6 .....                                                   | S-32 |
| <b>References</b> .....                                                                                                                              | S-33 |

## Experimental Section

### Chemicals

All the oligonucleotides used in this study were synthesized and HPLC-purified by Sangon Biotech (Shanghai, China). The sequences of oligonucleotides were listed in **Table S1**. Ammonium persulfate, Tris, glacial acetic acid, copper sulfate pentahydrate, dimethyl sulfoxide and spermine were purchased from Aladdin Biochemical Technology Co., Ltd (Shanghai, China). Antibody for SOCS1 (AF5378; 1:1000) was purchased from Affinity Biosciences group Ltd (Changzhou, China). Antibodies for HMGA2 (20795-1-AP; 1:1000),  $\beta$ -actin (66009-1-Ig; 1:5000) and the HRP goat anti-rabbit IgG (SA00001-1; 1:5000) were purchased from Protein tech Co., Ltd (Wuhan, China). Trizol reagent was obtained from TAKARA Bio. Inc. (Dalian, China). Lipofectamine 3000 were purchased from Thermo Fisher Scientific Inc (Delaware, USA). Hoechst 33342 staining solution and PI/Annexin V-FITC apoptosis detection kit were obtained from Nanjing KeyGen Biotech Co., Ltd. (Nanjing, China). MTT, 4% paraformaldehyde and crystal violet were obtained from Sangon Biotech (Shanghai, China). 10 mM Tris-buffer was prepared by adding 10 mM Tris, 10 mM  $MgCl_2$ , 1 mM spermine and 0.2 mM of  $CuSO_4$  in ultrapure water and adjusted to pH 6.5 by a San-Xin MP511 miniature pH meter (Shanghai, China). Ultrapure water was obtained by the Direct-Q 8UV-R ultrapure water system (Dubuque, USA). All the reagents were of analytical grade. All the solutions and ultrapure water used were treated with DEPC and autoclaved to avoid degradation of RNA.

### Preparation and Characterization of CTS

10  $\mu$ L of Anti-155-E (1  $\mu$ M) and 10  $\mu$ L of let-7a mimic (1  $\mu$ M) were first mixed in 80  $\mu$ L of Tris-buffer (10 mM, pH 6.5, containing 10 mM  $MgCl_2$ , 1 mM spermine and 0.2 mM  $CuSO_4$ ). Then the mixture was heated to 95  $^{\circ}C$  for 5 min and rapidly cooled to 4  $^{\circ}C$ , following by hybridization at 37  $^{\circ}C$  for 1.5 h to form CTS. Control probes, including  $Con_L$ -CTS,  $Con_D$ -CTS and  $Con_N$ -CTS were prepared in the similar way.

15% native polyacrylamide gel electrophoresis (Native-PAGE) was performed at 90 V in 1 $\times$ TAMg buffer (20 mM Tris, 20 mM acetic and 10 mM  $MgCl_2$ ) to verify the formation of CTS. After 200 min electrophoresis in ice bath, the gel was stained with SYBR Gold for 30 min, and then was analyzed with Tanon 2500R (China).

For fluorescence analysis, fluorescence spectra of Cy5 were monitored by a Quanta Master fluorescence spectrophotometer ( $E_x=620$  nm,  $E_m=640-740$  nm). The target-triggered disassembly of CTS was investigated after incubation with DNA-155 (molar ratio 1:1) at 37 °C for 2 h. To investigate the stability, fluorescence behavior of CTS (100 nM) in 10% fetal bovine serum was monitored at 37 °C for 80 min. The melting temperature ( $T_m$ ) curves of CTS, hybrid of Anti-155-E and miR-155, Con<sub>D</sub>-CTS and Con<sub>N</sub>-CTS (100 nM) was recorded by a Quanta Master fluorescence spectrophotometer at 670 nm with an excitation wavelength of 620 nm.

Typically, 300  $\mu$ L each sample (2  $\mu$ M) was recorded by a MOS-500 circular dichroism (CD) spectrophotometer (Bio-Logic, France) in the range of 200~320 nm at room temperature. In each case, the background of the buffer solution was subtracted from the CD data and processed using Origin software.

### **Cell Culture**

MCF-7 cells (human breast cancer cell line), MDA-MB-231 cells (Human breast cancer cell line) and MCF-10A cells (normal human mammary epithelial cell line) were obtained from the cell bank of the Central Laboratory of Xiangya Hospital (Changsha, China). MCF-7 cells were cultured in Dulbecco's modified Eagles medium with high glucose (DMEM, Thermo Fisher Scientific, USA) supplemented with 10% (v/v) Fetal bovine serum, 100  $\mu$ g/mL streptomycin and 100 U/mL penicillin. MDA-MB-231 cells were cultured in the complete RPMI 1640 cell culture medium (Thermo Fisher Scientific, USA) containing 10% FBS and 1% penicillin-streptomycin (100  $\mu$ g/mL streptomycin and 100 U/mL penicillin). MCF-10A cells were cultured in Mammary Epithelia cell medium (Procell, China). All the cells were maintained at 37 °C in a 5% CO<sub>2</sub> humidified incubator (Thermo Fisher Scientific, USA).

### **Cytotoxicity of Lipofectamine 3000**

Generally,  $3 \times 10^4$  cells were firstly seeded and cultured in 96-well plates for 24 h. After washing with PBS, the cells were treated with 200  $\mu$ L cell medium containing the different dose of Lipofectamine 3000 at 37°C for 6 h. Then, the cell medium was removed, and 200  $\mu$ L of fresh cell medium was replenished. After 72 h incubation, 15  $\mu$ L MTT solution (5 mg/mL in PBS) was added into each well. After 4 h incubation, all the solution was removed, followed by addition of 150  $\mu$ L

DMSO. The absorbance in 490 nm was measured using a Varioskan Flash Multimode Reader (Thermo Scientific, USA).

### **Intracellular Activation of CTS**

miR-155 triggered disassembly of CTS in tumor cells was evaluated by laser scanning confocal microscopy (CLSM). Generally,  $4 \times 10^5$  cells were firstly seeded and cultured in CLSM dishes for 24 h. After washing 3 times with PBS, triplex switches (100 nM) were transfected into the cells by using Lipofectamine 3000. Transfection was performed according to the manufacturer's instructions. After incubation at 37°C for 6 h in a 5% CO<sub>2</sub> humidified incubator (unless otherwise noted), Hoechst 33342 was added to label the cell nuclei for another 20 min at room temperature. Then, the cells were washed 3 times with PBS and then imaged by FV3000 confocal microscope (Olympus, Japan) with a 40× objective (zoom=2). Excitation wavelength and emission filters were described as follows. Hoechst 33342: E<sub>x</sub>=405 nm, E<sub>m</sub>=430-460 nm bandpass; Cy5: E<sub>x</sub>=633nm, E<sub>m</sub>=660 nm long-pass.

### **In Vitro Cytotoxicity Assessment**

Cells were seeded and cultured in 96-well culture plates at 37°C for 24 h with a density of  $3 \times 10^4$  cells per well. Then, the cells were treated with CTS or control therapeutic (100 nM) at 37°C for 6 h. After removing the medium and washed twice with PBS, each well was replenished with fresh medium (10% FBS) for further incubation. 48 h (unless otherwise noted) later, 15 μL sterile MTT stock solution (5 mg/mL in PBS) was added into each well. After 4 h incubation, all the solution was removed, followed by addition of 150 μL DMSO. The absorbance in 490 nm was measured using a Varioskan Flash Multimode Reader (Thermo Scientific, USA).

### **Cellular Migration and Survival Performance**

For colony formation assay,  $2 \times 10^5$  MCF-7 cells were firstly treated with different therapeutics formulations (100 nM) for 6 h at 37 °C, then cultured in 24-well plates at a density of 200 cells per well. About 2 weeks later, cells were fixed using 4% paraformaldehyde and stained with 0.05% crystal violet for 30 min. Cell colonies were washed three times with ultrapure water and methanol. Colonies were recorded via a light microscope.

For wound healing assay, cells ( $4 \times 10^5$ /well) were seeded in CLSM dishes for 48 h at 37 °C. While the cell fusion degree was greater than 90%, the cells were treated with different therapeutics

formulations (100 nM) for 6 h, an artificial wound was created onto the monolayer using a sterile tip, after removing the medium and washed twice with PBS, each well was replenished with fresh medium (10% FBS) for further incubation. Then, after 0 h, 6 h, 12 h, 24 h, time-lapse photographing of the wound closures was performed by an Olympus light microscope (Tokyo, Japan).

### **Cell Apoptosis**

Cells were cultured in the 6-well plates ( $4 \times 10^5$ /well) at 37 °C for 24 h. After treatment with different therapeutic formulations (150 nM) for 6 h, the cells were washed twice with PBS and supplemented with culture medium for 48 h incubation. Then, the cells were collected for flow cytometric assay after staining by Annexin V-FITC and PI for 15 min. Flow cytometric assay was performed using A00-1-1102 Flow Cytometer/ (Beckman Coulter, United States).

### **RT-PCR Quantification**

To quantify the relative expression of *hmga2* and *socs1*, MCF-7 cells ( $4 \times 10^5$ /well) were seeded in 6-well plates for 24 h, and then the cells were incubated with CTS or other different control therapeutic (150 nM) at 37°C for 6 h. After removing the medium and washed twice with PBS, each well was replenished with 2 mL fresh medium (10% FBS) for further incubation. After 48 h, total cellular RNA was extracted from the cells using Trizol reagent according to the kit protocol. cDNA was prepared from 1000 µg of total RNA by using PrimeScript™ RT reagent Kit with gDNA Eraser (Takara). Real-time PCR was then performed with 2×SYBR Green qPCR Master Mix on a CFX96TOUCH Real-Time PCR system (BIO-RAD, USA). The reactions were processed under the following cycling steps: 95 °C for 5 min, 40 cycles of 95 °C for 15 s, 55 °C for 60 s, and 72 °C for 30 s.  $\beta$ -actin was used as an internal control. The corresponding forward primer and reverse primer were listed in **Table S1**.

### **Western Blot Analysis**

Generally, cells were lysed in ice-cold RIPA buffer (Solarbio, China) supplemented with protease inhibitor mixture after undergoing different treatment as described in the RT-PCR assay. The lysates were placed on ice for 30 min and then centrifuged for 15 min with the speed of 14000 rpm at 4°C to remove cell debris. Afterward, the lysates were determined by the BCA protein assay reagent. Total cellular proteins were resolved on a 15% SDS-PAGE and transferred to a PVDF membrane.

After blocking with 5% skimmed milk in TBS containing 0.1% Tween-20 (TBST), antibodies against the HMGA2 and SOCS1 were added, respectively, for 12 h incubation at 4 °C. The membrane was washed three times with TBST, followed by incubation with horseradish peroxidase-conjugated goat anti-Rabbit IgG secondary antibody. After three times washing, proteins in membrane were visualized using SuperSignal™ West Pico PLUS Chemiluminescent Substrate (Thermo Fisher Scientific, USA) and analyzed with chemiluminescence detection system.



## Supplementary Tables

**Table S1.** All of the oligonucleotides and triplex switches used in this work<sup>a</sup>

| Oligomer or Triplex switch     |                     | Sequence (5'-3')                                                       |
|--------------------------------|---------------------|------------------------------------------------------------------------|
| CTS                            | Anti-155-E          | <i>CTA CTA CCC CT <u>ATC ACG ATT AGC ATT AA</u> TCT<br/>CCA TCA TC</i> |
|                                | let-7a mimic        | <i>AGA GGU AGU AGG UUG UAU AGU U</i>                                   |
| Con <sub>L</sub> -CTS          | Con-E1 <sup>b</sup> | <i>CTA CTA CCC CT <u>TCA AGC CTC TCC ATA AC</u> TCT<br/>CCA TCA TC</i> |
|                                | let-7a mimic        | <i>AGA GGU AGU AGG UUG UAU AGU U</i>                                   |
| Con <sub>N</sub> -CTS          | Con-E2 <sup>c</sup> | <i>CTA CTA CCC CT <u>TCA AGC CTC TCC ATA AC</u> TAT<br/>ATA TAT AT</i> |
|                                | let-7a mimic        | <i>AGA GGU AGU AGG UUG UAU AGU U</i>                                   |
| Con <sub>D</sub> -CTS          | Con-E3 <sup>d</sup> | <i>TCT TTT CTT TC <u>TCA AGC CTC TCC ATA AC</u> CT TTC<br/>TTT TCT</i> |
|                                | Con-7a <sup>e</sup> | <i>GAA AGA AAA GAT AAT ATA ATA T</i>                                   |
| miR-155 mimic                  |                     | <i>UUA AUG CUA AUC GUG AUA GGG G</i>                                   |
| miR-155 inhibitor              |                     | <i>CCC CUA UCA CGA UUA GCA UUA A</i>                                   |
| Sub <sub>7a</sub> <sup>1</sup> |                     | <i>TGA TTT GCA AGG AAC TAC CTC C</i>                                   |
| DNA-21                         |                     | <i>TAG CTT ATC AGA CTG ATG TTG</i>                                     |
| DNA-122                        |                     | <i>TGG AGT GTG AGA ATG GTG TTT G</i>                                   |
| DNA-31                         |                     | <i>AGG CAA GAT GCT GGC ATA GCT</i>                                     |
| DNA-221                        |                     | <i>ACC AAC CTG GCA TAC AAT GTA GAT TTC AGG</i>                         |
| DNA-205                        |                     | <i>ACC AGA TTT CAG TGG AGT GAA GTT CAG G</i>                           |
| DNA-155                        |                     | <i>TTA ATG CTA ATC GTG ATA GGG G</i>                                   |
| mt 1                           |                     | <i>TTA ATG <b>CGA</b> ATC GTG ATA GGG G</i>                            |
| mt 2                           |                     | <i>TTA ATG <b>CGA</b> ATC GTG <b>AGA</b> GGG G</i>                     |
| mt 3                           |                     | <i>TTA ATG <b>CGA</b> ATC <b>CTG</b> <b>AGA</b> GGG G</i>              |
| hmga2 forward primer           |                     | <i>GTC CCT CTA AAG CAG CTC AAA A</i>                                   |
| hmga2 reverse primer           |                     | <i>CTC CCT TCA AAA GAT CCA ACT G</i>                                   |
| socs1 forward primer           |                     | <i>AGA GCT TCG ACT GCC TCT TC</i>                                      |
| socs1 reverse primer           |                     | <i>GAT GCG CTG GCG GCA CAG CT</i>                                      |
| β-Actin forward primer         |                     | <i>CCT GGC ACC CAG CAC AAT</i>                                         |
| β-Actin reverse primer         |                     | <i>GGG CCG GAC TCG TCA TAC</i>                                         |

**Continued**

| Oligomer or Triplex switch |                | Sequence (5'-3')                                                                   |
|----------------------------|----------------|------------------------------------------------------------------------------------|
| CTS-4                      | Anti-21-E-4    | <i>CTA CTA CCT CA</i> <u>TCA ACA TCA GTC TGA TAA GCT</u><br><i>A_CTC CAT CAT C</i> |
|                            | let-7a mimic-4 | <i>UGA GGU AGU AGG</i> UUG UAU AGU U                                               |
| CTS-5                      | Anti-21-E-5    | <i>TTT ACA TTC CA</i> <u>TCA ACA TCA GTC TGA TAA GCT</u><br><i>A_CCT TAC ATT T</i> |
|                            | miR-1 mimic    | <i>UGG AAU GUA AA</i> GAA GUA UGG AG                                               |
| CTS-6                      | Anti-155-E-6   | <i>TTT ACA TTC CA</i> <u>TAT CAC GAT TAG CAT TA ACC T</u><br><i>TAC ATT T</i>      |
|                            | miR-1 mimic    | <i>UGG AAU GUA AA</i> GAA GUA UGG AG                                               |

<sup>a</sup> For the sequences above, the loop of triplex triplex switch is shown underlined, the stem region of triplex triplex switch is shown in italic, the mismatched base in mutants of miR-155 is shown in red.

<sup>b</sup> For Con-E1, it is obtained by replacing the anti-155 sequence in Anti-155-E with arbitrary base composition, which can hybridize with let-7a mimic to form triple-helix stabilized Con<sub>L</sub>-CTS.

<sup>c</sup> For Con-E2, it is obtained by replacing one arm sequence in Con-E1 with arbitrary base composition, which can hybridize with let-7a mimic to form double helix stabilized Con<sub>N</sub>-CTS.

<sup>d</sup> For Con-E3, it is obtained by shuffling Anti-155-E composition.

<sup>e</sup> Con-7a is designed with arbitrary base composition instead of let-7a mimic sequence, which can hybridize with Anti- Con-E3 to form triple-helix stabilized Con<sub>D</sub>-CTS.

**Table S2.** Quantification of hmga2 expression in Fig. 3A

| Therapeutic agent     | Relative hmga2 expression level | Error bar |
|-----------------------|---------------------------------|-----------|
| Blank                 | 1.0000                          | 0.0822    |
| CTS                   | 0.4940                          | 0.0188    |
| Con <sub>L</sub> -CTS | 0.7779                          | 0.0159    |
| Con <sub>D</sub> -CTS | 0.8785                          | 0.0564    |
| Con <sub>N</sub> -CTS | 0.5370                          | 0.0157    |

**Table S3.** Quantification of cell viability in Fig. 3C

| Type of cell | Therapeutic agent     | Cell viability (%) | Error bar |
|--------------|-----------------------|--------------------|-----------|
| MCF-7        | Blank                 | 100.0000           | 6.9691    |
|              | CTS                   | 52.7322            | 3.0624    |
|              | Con <sub>L</sub> -CTS | 88.7653            | 4.8516    |
|              | Con <sub>D</sub> -CTS | 92.4828            | 7.8846    |
|              | Con <sub>N</sub> -CTS | 77.8728            | 7.6893    |
| MCF-10A      | Blank                 | 100.0000           | 2.7663    |
|              | CTS                   | 96.4609            | 5.9168    |

**Table S4.** Quantification of hmga2, socs1 expression in Fig. 4A

| Therapeutic agent | Relative hmga2 expression level | Error bar | Relative socs1 expression level | Error bar |
|-------------------|---------------------------------|-----------|---------------------------------|-----------|
| Blank             | 1.0000                          | 0.0173    | 1.0000                          | 0.0830    |
| let-7a mimic      | 0.5407                          | 0.0864    | 1.0241                          | 0.0621    |
| Anti-155-E        | 0.9256                          | 0.0439    | 1.7142                          | 0.0643    |
| CTS               | 0.6950                          | 0.0414    | 1.8833                          | 0.0541    |

**Table S5.** Quantification of cell viability in Fig. 4C

| Incubation time | Cell viability with different treatments (%) |           |              |           |            |           |        |           |
|-----------------|----------------------------------------------|-----------|--------------|-----------|------------|-----------|--------|-----------|
|                 | Blank                                        | Error bar | let-7a mimic | Error bar | Anti-155-E | Error bar | CTS    | Error bar |
| 0               | 100.00                                       | 0.00      | 100.00       | 0.00      | 100.00     | 0.00      | 100.00 | 0.00      |
| 24              | 100.00                                       | 7.27      | 90.19        | 3.65      | 81.43      | 2.64      | 77.50  | 6.90      |
| 48              | 100.00                                       | 6.71      | 72.64        | 3.10      | 63.42      | 5.67      | 52.85  | 3.34      |
| 72              | 100.00                                       | 4.32      | 64.69        | 3.08      | 51.93      | 6.22      | 25.32  | 1.84      |

**Table S6.** Quantification of colony density in Fig. 4D

| Therapeutic agent | Colony Density |
|-------------------|----------------|
| Blank             | 6463.0000      |
| let-7a mimic      | 4603.0000      |
| Anti-155-E        | 3428.0000      |
| CTS               | 2459.0000      |

## Supplementary Figures

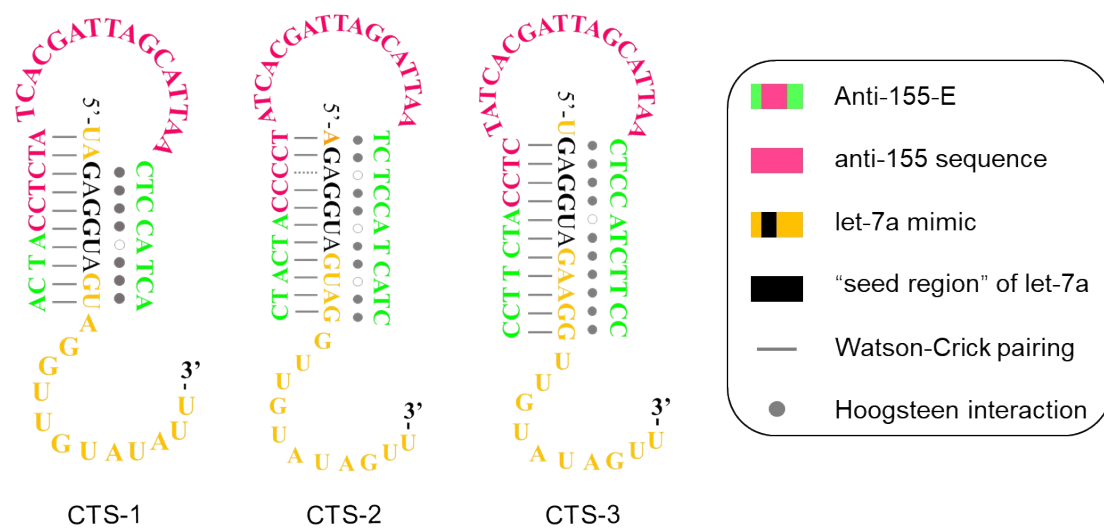

**Fig. S1.** The sequence details of CTS-1, CTS-2, CTS-3 with different triple-helix stem.

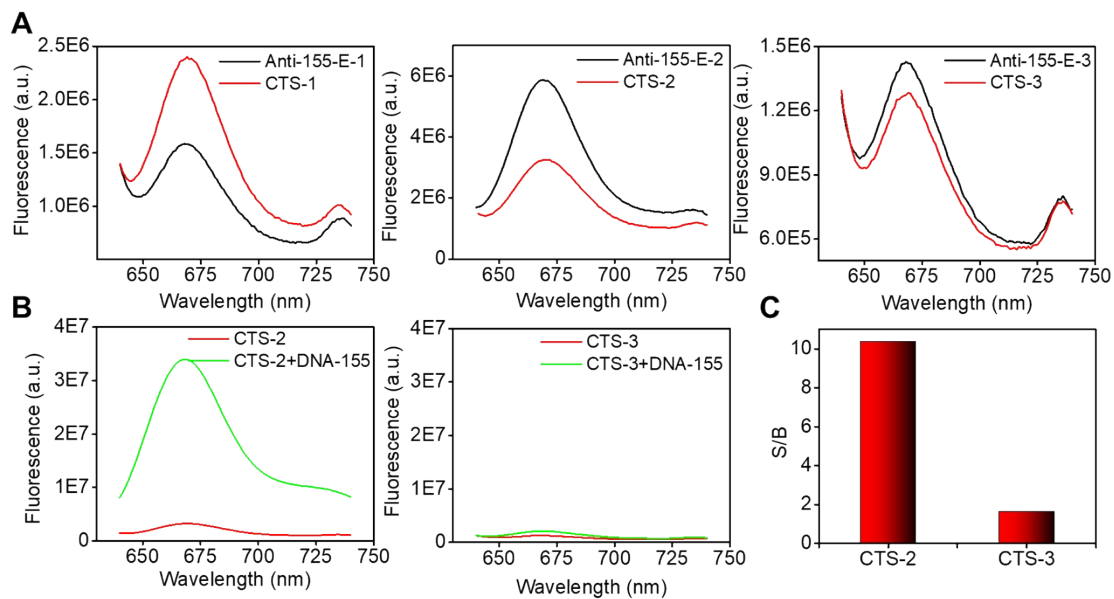

**Fig. S2.** (A) Fluorescence changes of Cy5 after adding let-7a mimic (100 nM) into different Anti-155-E strands (100 nM), respectively. The decreased fluorescence indicated formation of triple-helix stabilized CTS-2, CTS-3. For CTS-1, the length of triple-helix stem was too short to maintain its stability. (B) Fluorescence behaviors of CTS-2, CTS-3 in response to DNA-155 (100 nM), respectively. (C) The fluorescence ratios of (CTS+DNA-155) to CTS in (B). The higher S/B suggested CTS-2 had better responsiveness.

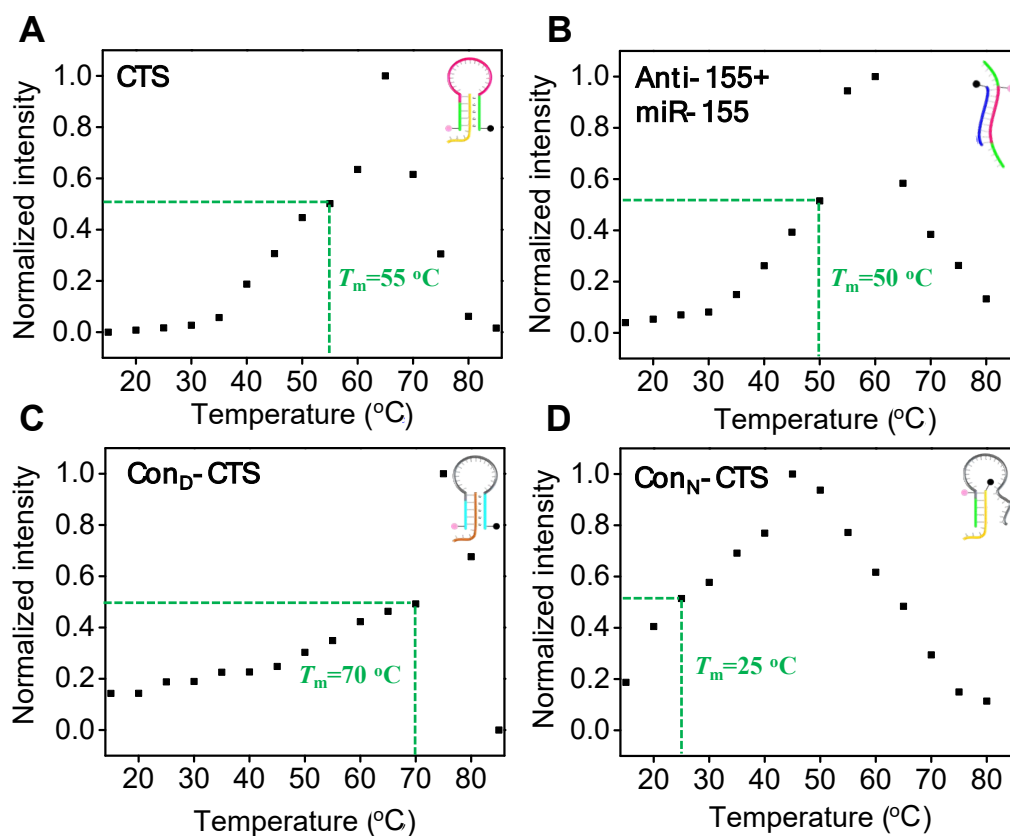

**Fig. S3.** The melting temperature ( $T_m$ ) curves of (A) CTS, (B) hybrid of Anti-155-E and miR-155, (C) Con<sub>D</sub>-CTS and (D) Con<sub>N</sub>-CTS. Fluorescence emission was recorded at 670 nm with an excitation wavelength of 620 nm. Switches concentration: 100 nM.

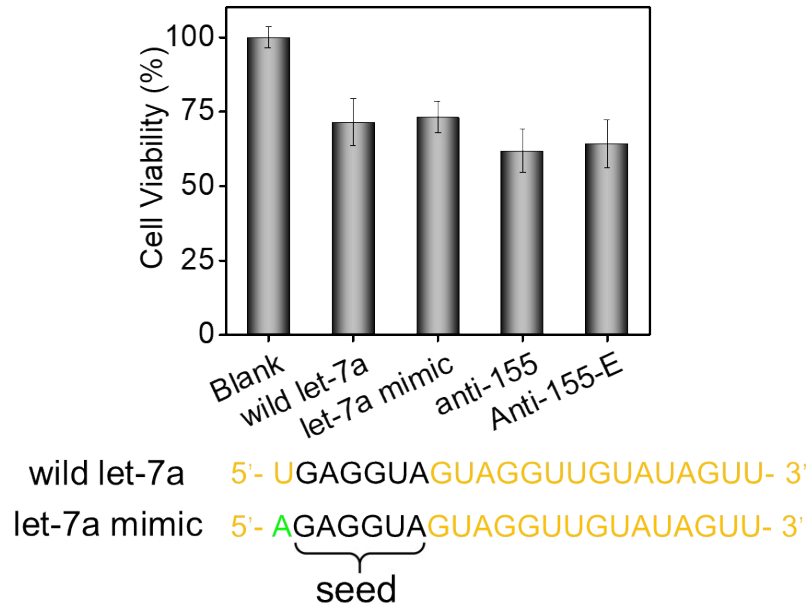

**Fig. S4.** Viability of MCF-7 cells treated with wild let-7a, let-7a mimic, anti-155 and Anti-155-E at 37°C for 48 h. Error bars represent standard deviations from five repeated experiments. The mutation is shown in green.

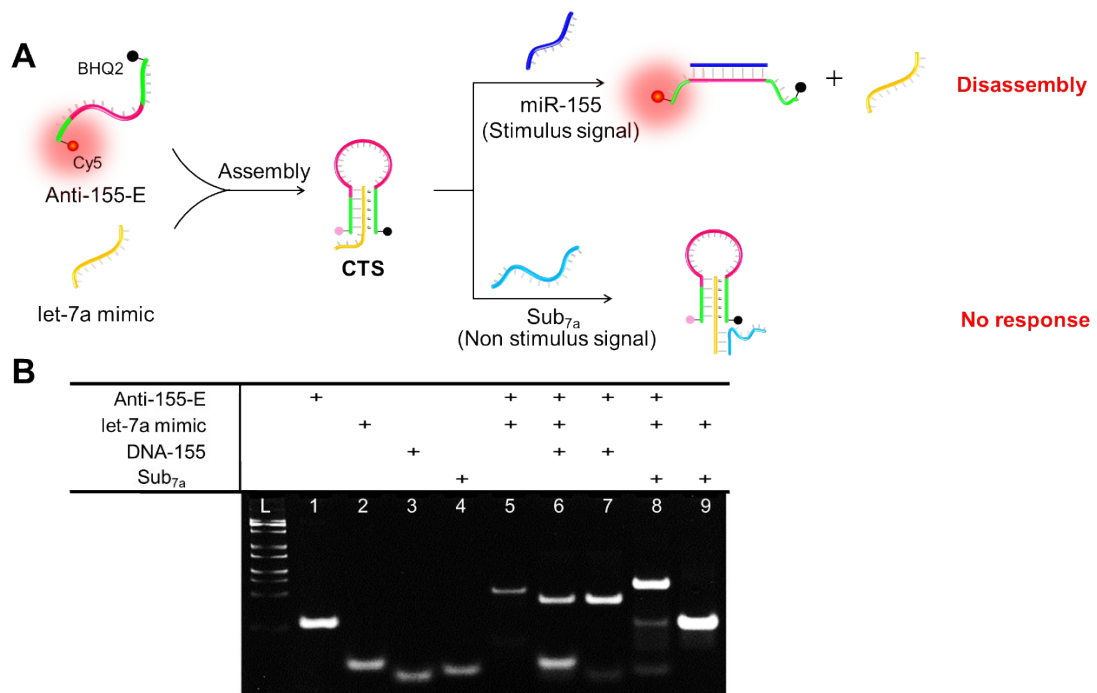

**Fig. S5.** Validation of CTS's assembly and disassembly in response to different oligonucleotides. (A) Illustration of the assembly and disassembly of CTS. (B) 15% PAGE analysis of the assembly and disassembly of CTS.



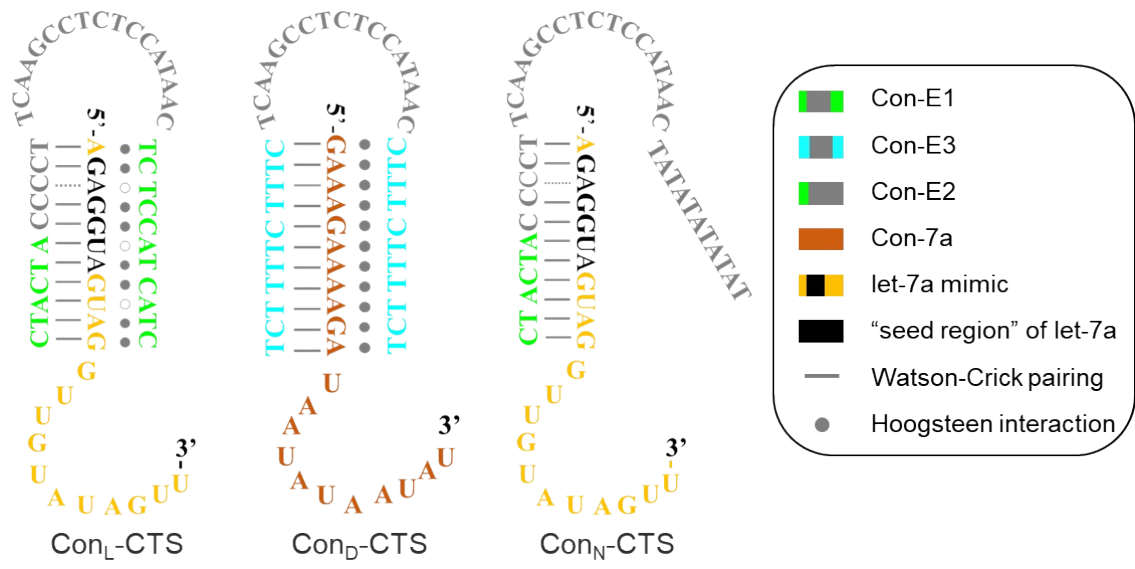

**Fig. S6.** The sequence detail of Con<sub>L</sub>-CTS, Con<sub>D</sub>-CTS and Con<sub>N</sub>-CTS.

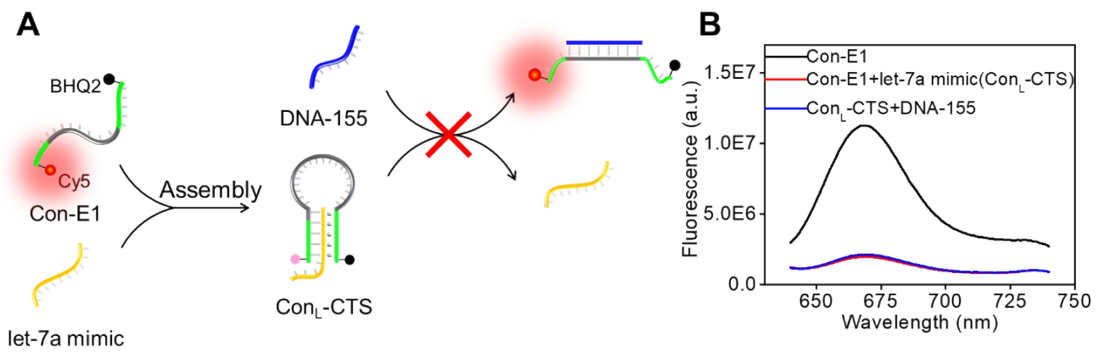

**Fig. S7.** (A) Illustration of the assembly of Con<sub>L</sub>-CTS and its response behavior to DNA-155. (B) Fluorescence change of Con<sub>L</sub>-CTS in response to DNA-155.

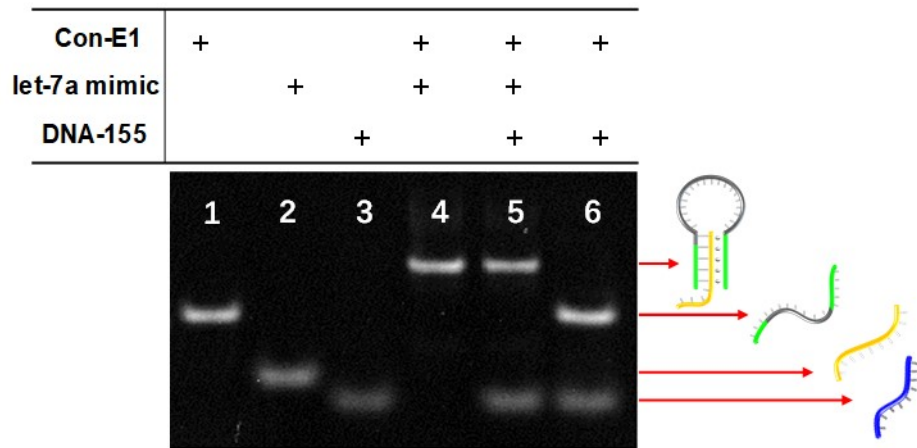

**Fig. S8.** 15% PAGE analysis the assembly and disassembly of Con<sub>L</sub>-CTS.

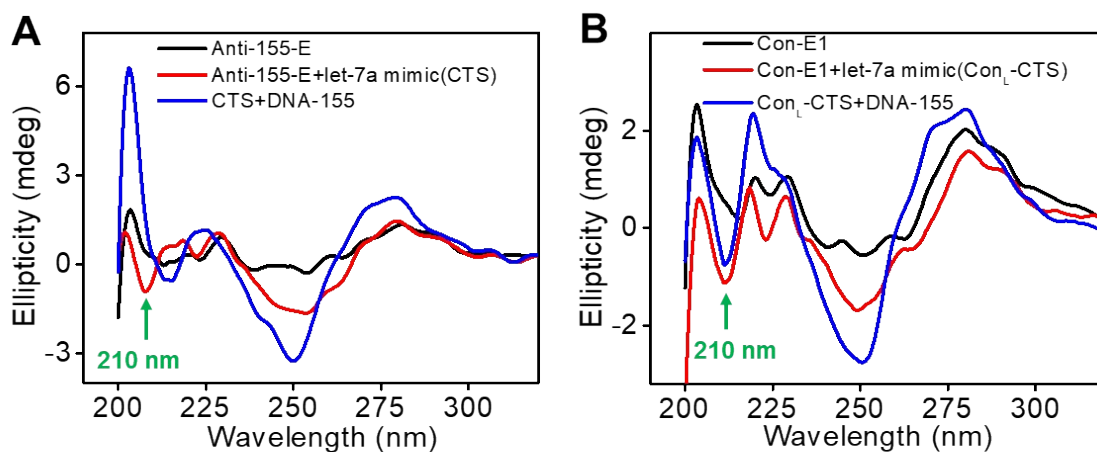

**Fig. S9.** Changes of circular dichroism (CD) spectra of (A) CTS and (B) Con<sub>L</sub>-CTS in response to DNA-155, respectively. The CD spectral profile characterized with a negative band centered at ~210 nm indicates the formation of triple helix.<sup>2,3</sup>

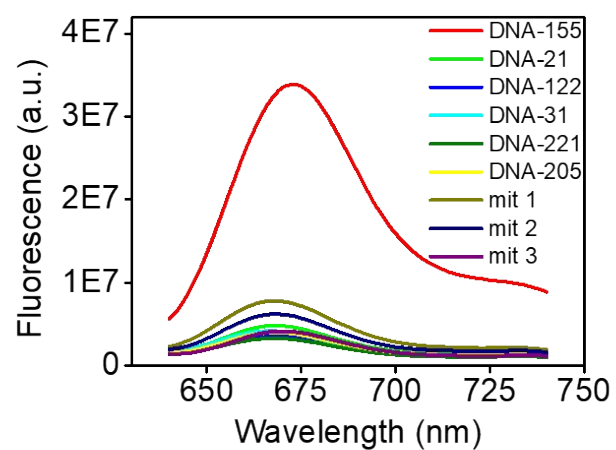

**Fig. S10.** The fluorescence intensity of CTS in the presence of different analytes. The detections were carried out in 10 mM Tris-HAc buffer after incubating CTS (100 nM) and different analytes (100 nM) at 37 °C for 2 h.

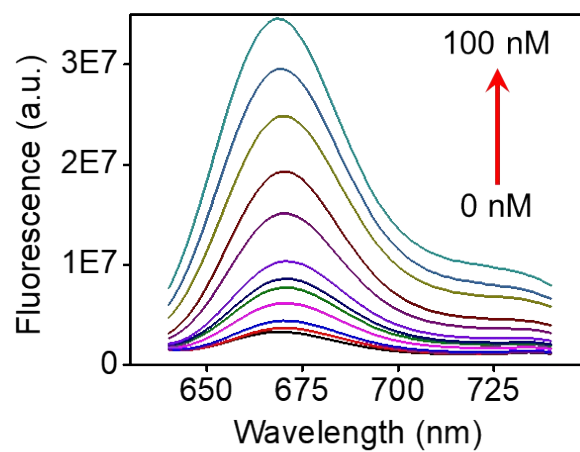

**Fig. S11.** Fluorescence recovery of CTS in response to DNA-155 with varying concentrations (0, 0.3, 1.0, 2.5, 7.5, 15.0, 30.0, 40.0, 50.0, 70.0, 90.0, 100.0 nM).

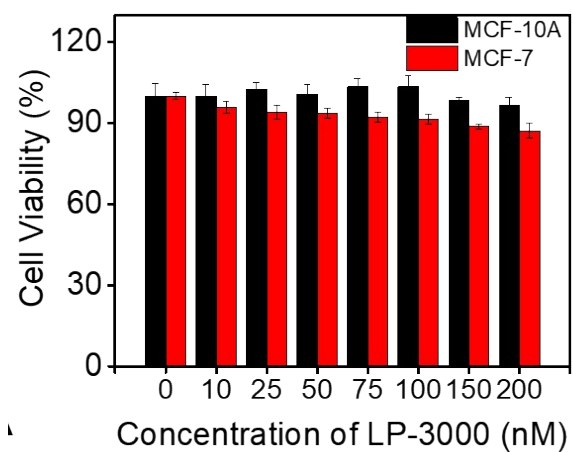

**Fig. S12.** Viability of MCF-7 cells treated with Lipofectamine 3000 (LP-3000) at different doses for 72 h. Error bars represent standard deviations from five repeated experiments.

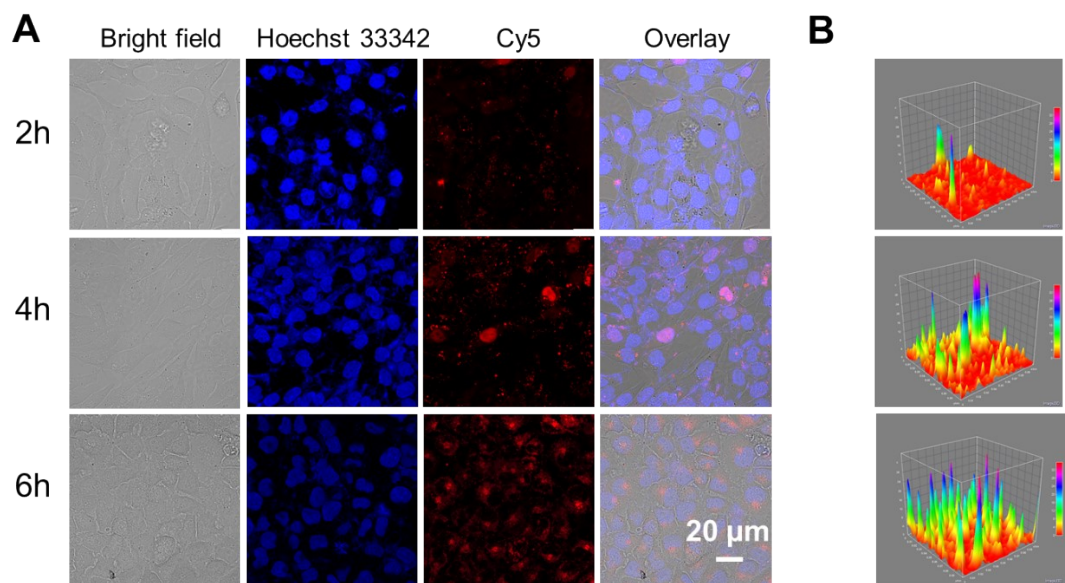

**Fig. S13.** (A) Confocal microscopy images of MCF-7 cells treated with CTS for different times. (B) Quantitative analysis of fluorescence intensity in (A) at the corresponding time.



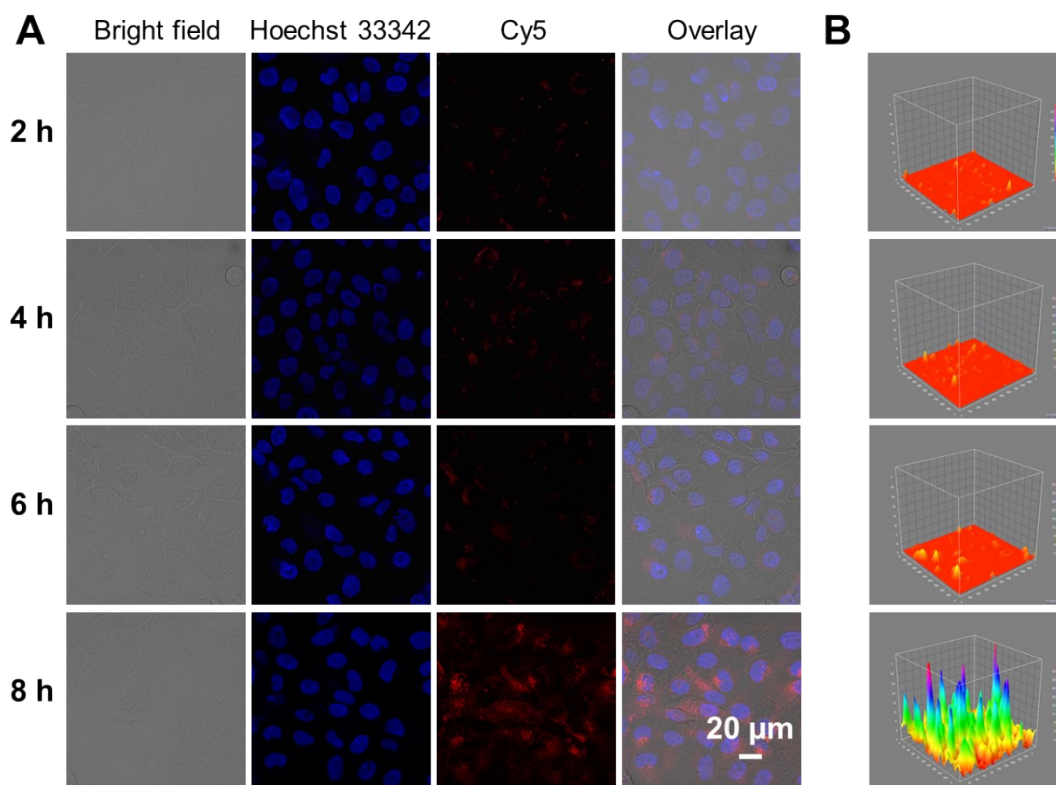

**Fig. S14.** (A) Confocal microscopy images of MCF-10A cells treated with CTS (100 nM) for different times. (B) Quantitative analysis of intracellular fluorescence intensity of CTS at the corresponding time. The results showed that most of CTSs in MCF-10A cells kept intact structure with faint fluorescence after 6 h incubation, due to lack of stimulus. When prolonging the incubation time to 8 h, non-specific disassembly for nuclease degradation was observed, accompanied by remarkably enhanced fluorescence.

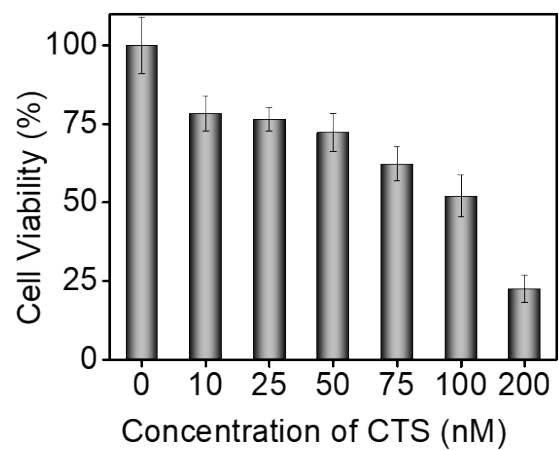

**Fig. S15.** Viability of MCF-7 cells treated with CTS at different doses for 48 h. Error bars represent standard deviations from five repeated experiments.

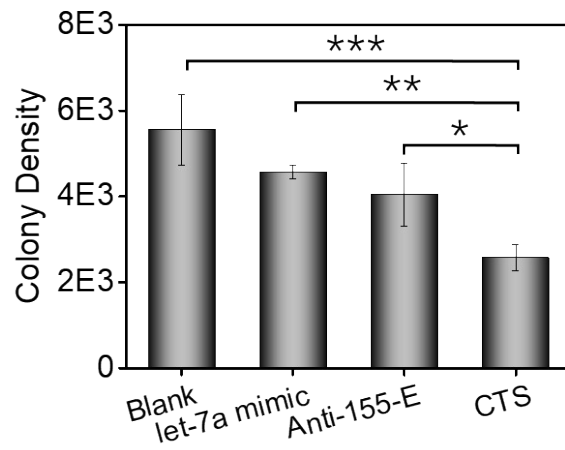

**Fig. S16.** Graph depicts the colony density of MCF-7 cells in Fig. 4D that calculated by Image J (n=3, statistical analysis performed with a two-tailed Student's t-test, \*\*\*P <0.001; \*\*P <0.01; \*P <0.05).

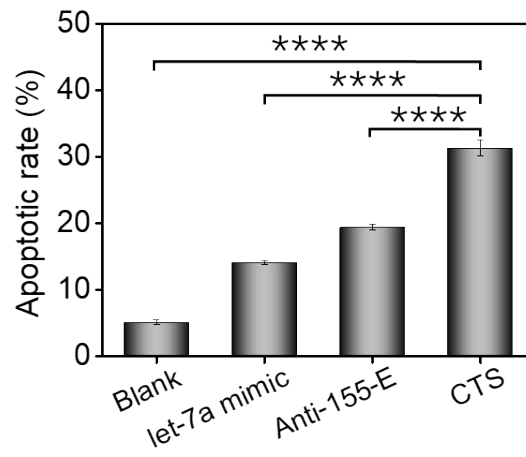

**Fig. S17.** Graph depicts the apoptotic rate in MCF-7 cells with different treatment in Fig. 4E (n=3, statistical analysis performed with a two-tailed Student's t-test, \*\*\*\*P<0.0001).

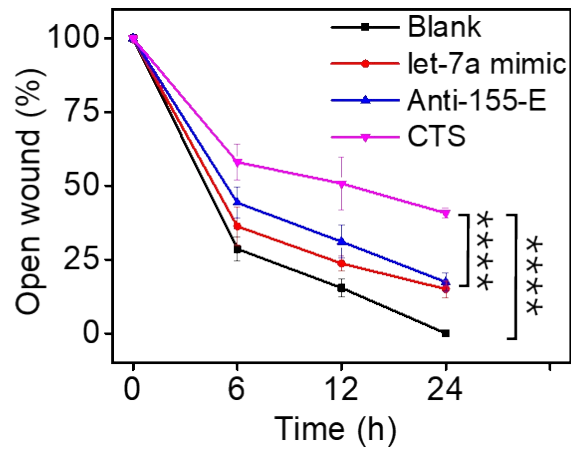

**Fig. S18.** Graph depicts the relative width of open wound in Fig. 4F (n=3, statistical analysis performed with a two-tailed Student's t-test, \*\*\*P<0.0001).

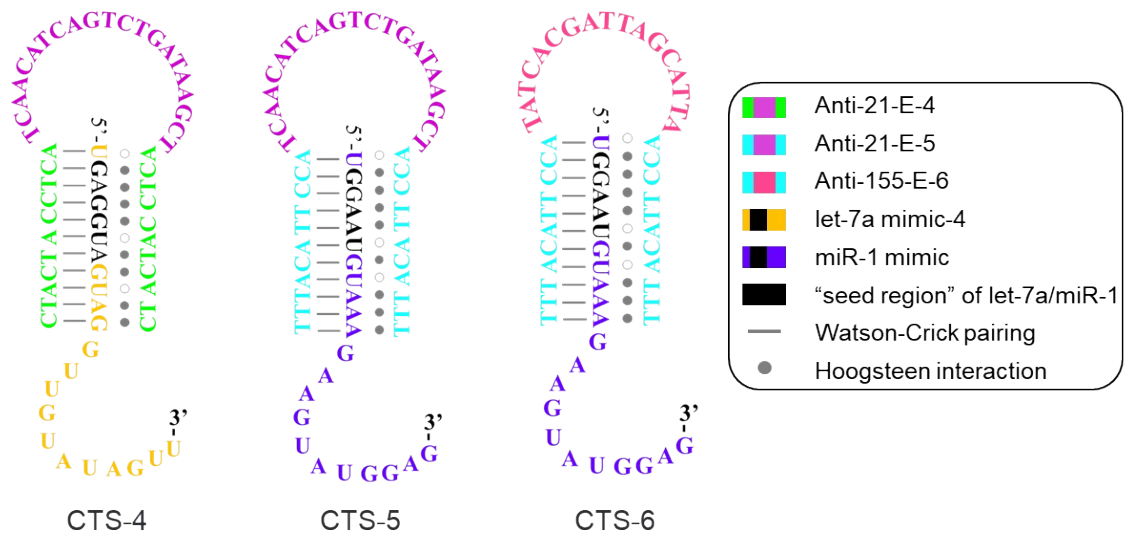

**Fig. S19.** A series of clamp-like triplex switches, including CTS-4, CTS-5 and CTS-6 were designed to demonstrate the generality of CTS-based strategy. CTS-4 consists of a let-7a mimic-4 and an anti-21 sequence contained exterior strand (Anti-21-E-4). CTS-5 consists of a miR-1 mimic and an anti-21 sequence contained exterior strand (Anti-21-E-5). CTS-6 consists of a miR-1 mimic and an anti-155 sequence contained exterior strand (Anti-155-E-6).

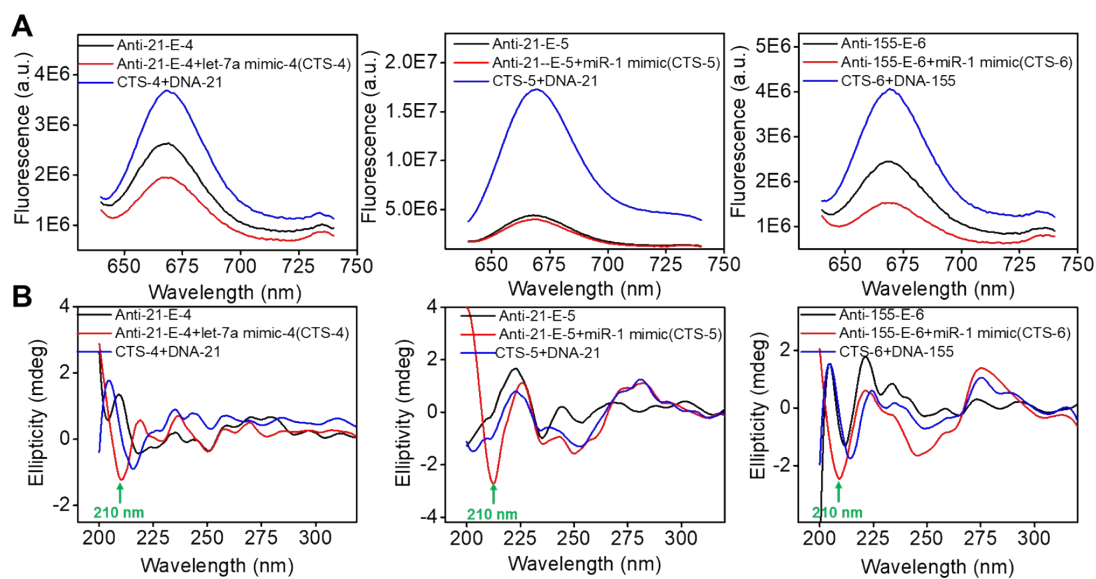

**Fig. S20.** (A) Fluorescence changes of Cy5 after adding miRNA mimic (100 nM) into different Anti-miR-E strands (100 nM), respectively. The decreased fluorescence (red lines) indicated formation of triple-helix stabilized CTS-4, CTS-5 and CTS-6. The recovered fluorescence (blue lines) suggested that triplex switches underwent conformation alters in response to the corresponding stimulus signal (100 nM). (B) Changes of CD spectra of CTS-4, CTS-5 and CTS-6 in response to the corresponding stimulus signal, respectively. The CD spectral profile characterized with a negative peak centered at  $\sim 210$  nm indicates the formation of triple helix.

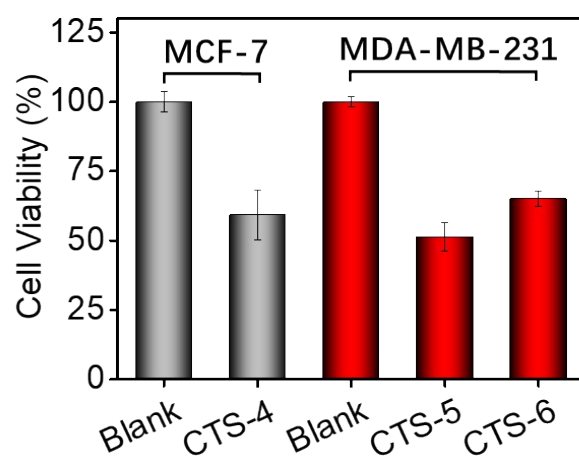

**Fig. S21.** Viability of MCF-7 and MDA-MB-231 cells treated with different triplex switches (100 nM) for 48 h. Error bars represent standard deviations from five repeated experiments.



## References

1. Mayr, C.; Hemann, M. T.; Bartel, D. P. Bartel. Disrupting the Pairing Between let-7 and Hmga2 Enhances Oncogenic Transformation. *Science*, 2007, **315**, 3576-3579.
2. Lu, S.S.; Wang, S.; Zhao, J.H; Sun, J.; Yang, X.R. Classical Triplex Molecular Beacons for MicroRNA-21 and Vascular Endothelial Growth Factor Detection. *ACS Sens.* 2018, **3**, 2438-2445.
3. Giancola, C.; Buono, A.; Montesarchio, D.; Barone, G. Calorimetric, spectroscopic and computational investigation of DNA triplexes containing a 3'-3' internucleoside junction. *Phys. Chem. Chem. Phys.* 1999, **1**, 5045-5049.
